# Supplementary material for: Enhanced reductive transformation of 2,4-dinitroanisole in a anaerobic system: the key role of zero valent iron
Source: Royal Society of Chemistry journal article supplement (doi:10.1039/c5ra11197h), 2015-01-01
Supplement: c5ra11197h1.pdf [file c5ra11197h1.pdf]

**Supporting Information**

**For**

**Enhanced reductive transformation of 2,4-dinitroanisole in the  
anaerobic system: the key role of zero valent iron**

Changjin Ou<sup>a</sup>, Shuai Zhang<sup>a,b</sup>, Jianguo Liu<sup>a</sup>, Jinyou Shen<sup>a,\*</sup>, Weiqing Han<sup>a</sup>, Xiuyun  
Sun<sup>a</sup>, Jiansheng Li<sup>a</sup>, Lianjun Wang<sup>a,\*\*</sup>

<sup>a</sup>Jiangsu Key Laboratory for Chemical Pollution Control and Resources Reuse,  
School of Environmental and Biological Engineering, Nanjing University of Science  
and Technology, Nanjing, 210094, China

<sup>b</sup>Jiangsu Changhuan Environmental Science Co. LTD, Changzhou 213022, Jiangsu  
Province, China

Corresponding author: \*Jinyou Shen, Tel/Fax: +86 25 84303965, E-mail address:  
shenjinyou@mail.njust.edu.cn; \*\*Lianjun Wang, Tel/Fax: +86 25 84315941, E-mail  
address: wanglj@mail.njust.edu.cn.

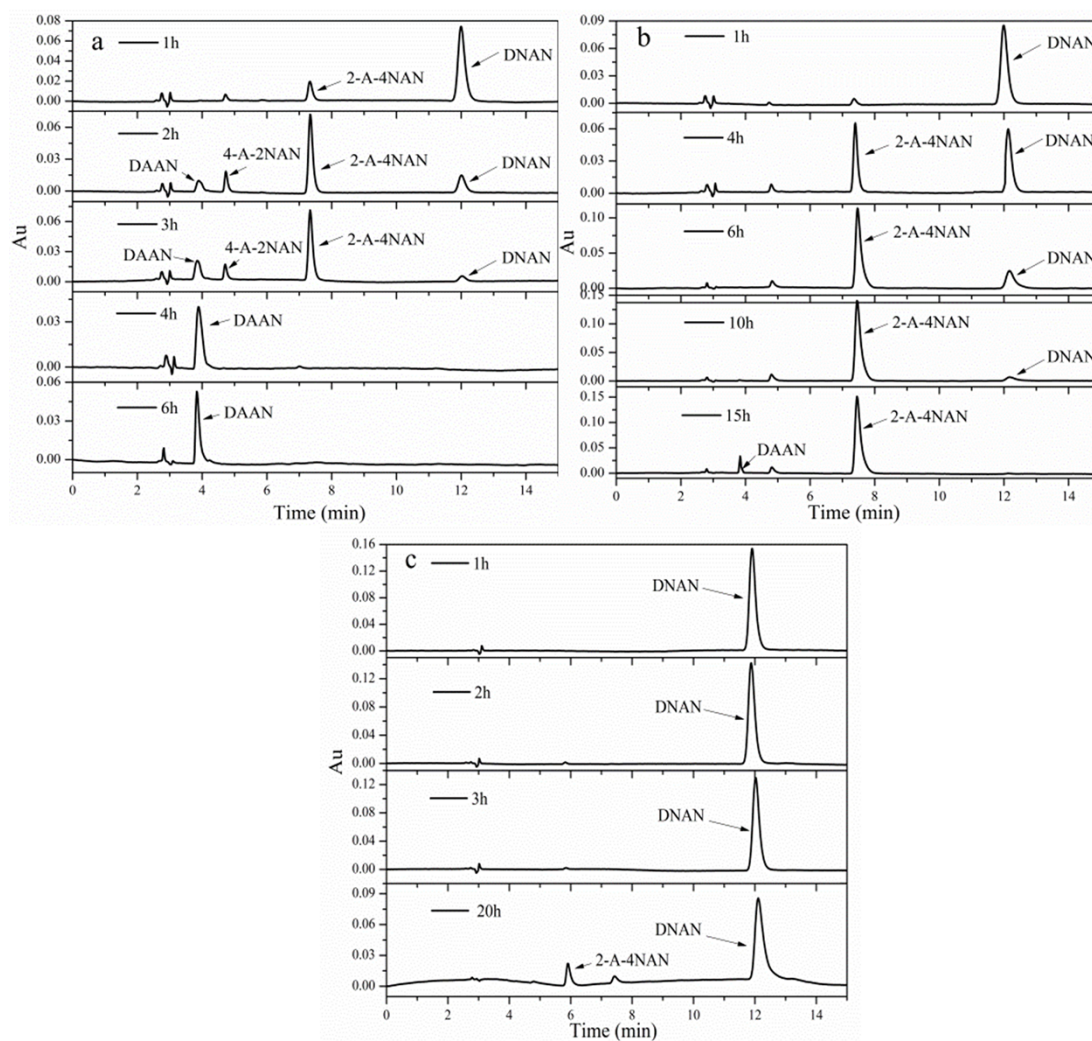

**Figure S1** Evolution of HPLC chromatogram for the DNAN reduction in three individual systems as a function of time: (a) ZVI coupled anaerobic system; (b) biotic control system and (c) ZVI control system.

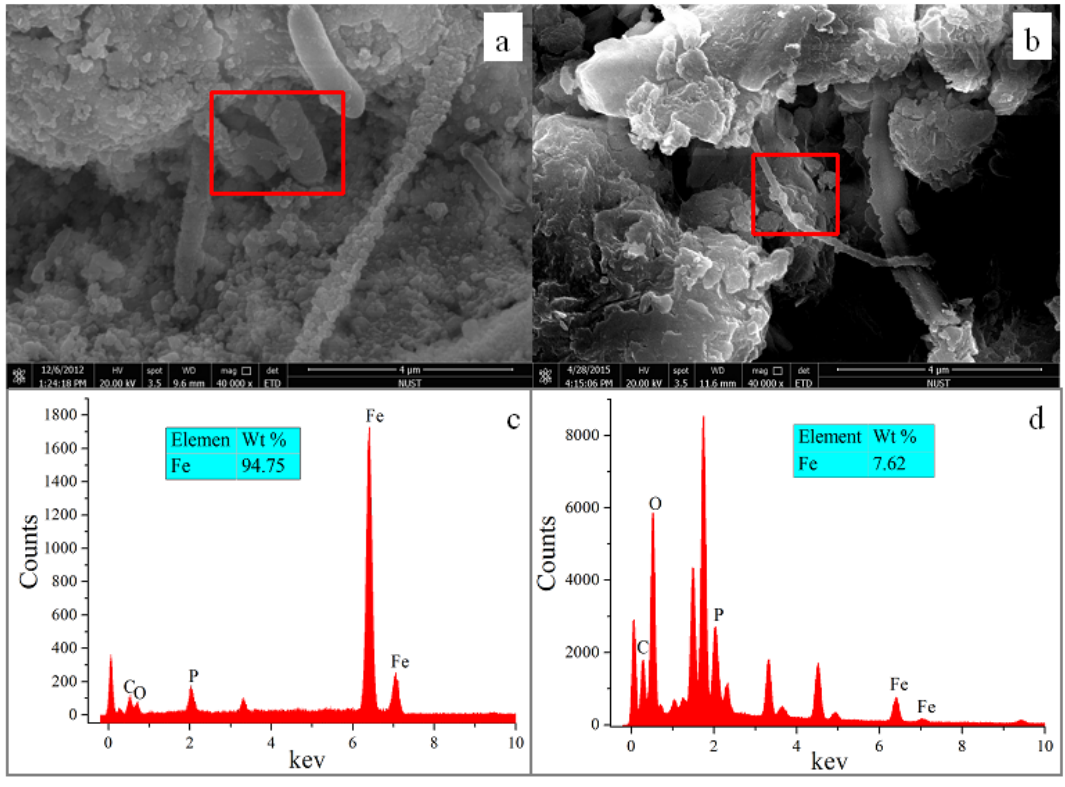

**Figure S2** SEM images showing the morphology and distribution of ZVI on the outer layer (a) and inner parts of the microorganisms (b); EDS spectrums for the selected area of the SEM image a(c) and image c(d).

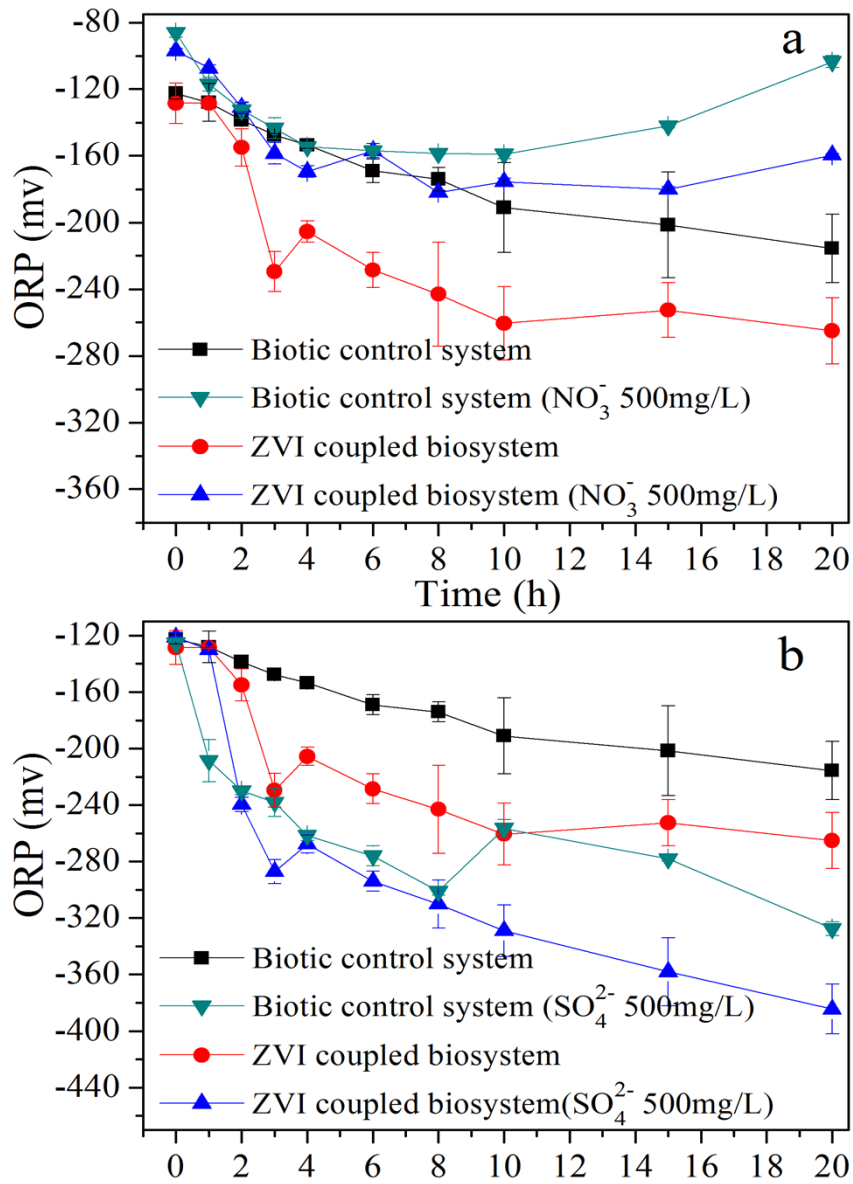

**Figure S3** Evolution of the ORP during the reduction of DNAN in the two individual systems with the coexistence of different electron acceptors: (a) nitrate; (b) sulfate.
